# Supplementary material for: Cytotoxicity of Oleandrin Is Mediated by Calcium Influx and by Increased Manganese Uptake in Saccharomyces cerevisiae Cells
Source: MDPI journal article supplement (doi:10.3390/molecules25184259), 2020-09-17
Supplement: s1 [file s1]

## Supplementary Materials for

# Cytotoxicity of Oleandrin Is Mediated by Calcium Influx and by Increased Manganese Uptake in *Saccharomyces cerevisiae* Cells

**Table S1.** Effect of oleandrin on the growth of various single-gene knockout mutants of *Saccharomyces cerevisiae*. Strains were inoculated (initial cell density  $5 \times 10^5$  cells/mL) in SD media containing 100 ng/mL oleandrin (final concentration). Growth was assessed spectrophotometrically (OD<sub>660</sub>) after 16 hours of incubation with shaking (200 rpm) at 30 °C and expressed (%) as the ration between cell density in the presence of oleandrin and cell density in the absence of oleandrin.

| Strain                                               | Gene Deleted | Gene Function                                                                                                                           | Growth in the Presence of Oleandrin (%) |
|------------------------------------------------------|--------------|-----------------------------------------------------------------------------------------------------------------------------------------|-----------------------------------------|
| Wild type <sup>1</sup>                               | None         | Control strain                                                                                                                          | 49.6 ± 2.8                              |
| <i>Genes involved in monovalent cation transport</i> |              |                                                                                                                                         |                                         |
| <i>ena1Δ</i>                                         | <i>ENA1</i>  | P-type ATPase sodium pump; involved in Na <sup>+</sup> and Li <sup>+</sup> efflux.                                                      | 51.2 ± 1.8                              |
| <i>nha1Δ</i>                                         | <i>NHA1</i>  | Na <sup>+</sup> /H <sup>+</sup> antiporter; involved in sodium and potassium efflux through the plasma membrane                         | 54.6 ± 2.5                              |
| <i>tok1Δ</i>                                         | <i>TOK1</i>  | Outward-rectifier potassium channel of the plasma membrane                                                                              | 47.2 ± 3.4                              |
| <i>trk1Δ</i>                                         | <i>TRK1</i>  | High affinity K <sup>+</sup> transporter                                                                                                | 53.1 ± 2.4                              |
| <i>trk2Δ</i>                                         | <i>TRK2</i>  | Trk1 paralog; K <sup>+</sup> transporter                                                                                                | 51.6 ± 1.9                              |
| <i>Genes involved in calcium homeostasis</i>         |              |                                                                                                                                         |                                         |
| <i>cch1Δ</i>                                         | <i>CCH1</i>  | Voltage-gated high-affinity Ca <sup>2+</sup> channel involved in calcium influx in response to some stresses                            | 78.8 ± 6.9 *                            |
| <i>mid1Δ</i>                                         | <i>MID1</i>  | Stretch-activated Ca <sup>2+</sup> -permeable cation channel; interacts with Cch1                                                       | 89.6 ± 7.9 **                           |
| <i>pmc1Δ</i>                                         | <i>PMC1</i>  | Vacuolar Ca <sup>2+</sup> -ATPase involved in depleting cytosol of Ca <sup>2+</sup> ions.                                               | 21.6 ± 1.7 **                           |
| <i>vcx1Δ</i>                                         | <i>VCX1</i>  | Vacuolar membrane antiporter with Ca <sup>2+</sup> /H <sup>+</sup> and K <sup>+</sup> /H <sup>+</sup> exchange activity                 | 43.6 ± 2.9                              |
| <i>yvc1Δ</i>                                         | <i>YVC1</i>  | Vacuolar cation channel; mediates release of Ca <sup>2+</sup> from the vacuole                                                          | 57.6 ± 4.9                              |
| <i>pmr1Δ</i>                                         | <i>PMR1</i>  | High affinity Ca <sup>2+</sup> /Mn <sup>2+</sup> P-type ATPase; required for Ca <sup>2+</sup> and Mn <sup>2+</sup> transport into Golgi | 16.8 ± 2.1                              |
| <i>Genes Involved in Heavy Metal Transport</i>       |              |                                                                                                                                         |                                         |

|                                                    |              |                                                                                                                                                                        |                |
|----------------------------------------------------|--------------|------------------------------------------------------------------------------------------------------------------------------------------------------------------------|----------------|
| <i>ctr1Δ</i>                                       | <i>CTR1</i>  | High-affinity copper transporter of plasma membrane                                                                                                                    | 48.6 ± 3.4     |
| <i>ftr1Δ</i>                                       | <i>FTR1</i>  | High-affinity iron transporter of the plasma membrane                                                                                                                  | 49.2 ± 4.3     |
| <i>fet4Δ</i>                                       | <i>FET41</i> | Low-affinity iron transporter of the plasma membrane                                                                                                                   | 54.6 ± 4.5     |
| <i>smf1Δ</i>                                       | <i>SMF1</i>  | Divalent metal ion transporter                                                                                                                                         | 91.6 ± 4.9 *** |
| <i>pho84Δ</i>                                      | <i>PHO84</i> | High-affinity inorganic phosphate (Pi) transporter and low-affinity divalent metal ion transporter                                                                     | 54.3 ± 3.7     |
| <i>ztr1Δ</i>                                       | <i>ZTR1</i>  | High-affinity Zn <sup>2+</sup> transporter of the plasma membrane                                                                                                      | 53.6 ± 3.9     |
| <i>ztr2Δ</i>                                       | <i>ZTR2</i>  | Low-affinity Zn <sup>2+</sup> transporter of the plasma membrane                                                                                                       | 54.5 ± 4.2     |
| <i>Genes involved response to oxidative stress</i> |              |                                                                                                                                                                        |                |
| <i>yap1Δ</i>                                       | <i>YAP1</i>  | Transcription factor; required for oxidative stress tolerance                                                                                                          | 41.6 ± 5.2     |
| <i>skn7Δ</i>                                       | <i>SKN7</i>  | Transcription factor required for optimal induction of heat-shock genes in response to oxidative stress                                                                | 43.8 ± 6.1     |
| <i>msn2Δ</i>                                       | <i>MSN2</i>  | Stress-responsive transcriptional activator                                                                                                                            | 50.6 ± 6.8     |
| <i>sod1Δ</i>                                       | <i>SOD1</i>  | Cu,Zn-Superoxide dismutase                                                                                                                                             | 48.6 ± 4.2     |
| <i>sod2Δ</i>                                       | <i>SOD2</i>  | Mn-Superoxide dismutase                                                                                                                                                | 47.3 ± 4.6     |
| <i>ahp1Δ</i>                                       | <i>AHP1</i>  | Thioredoxin peroxidase with alkyl hydroperoxide reductase activity                                                                                                     | 28.3 ± 3.2 **  |
| <i>ccp1Δ</i>                                       | <i>CCP1</i>  | Citochrome c peroxidase                                                                                                                                                | 48.6 ± 5.1     |
| <i>cta1Δ</i>                                       | <i>CTA1</i>  | Catalase A                                                                                                                                                             | 47.3 ± 4.8     |
| <i>ctt1Δ</i>                                       | <i>CTT1</i>  | Calalase T                                                                                                                                                             | 48.6 ± 5.2     |
| <i>gpx1Δ</i>                                       | <i>GPX1</i>  | Phospholipid hydroperoxide glutathione peroxidase                                                                                                                      | 513 ± 4.9      |
| <i>gpx2Δ</i>                                       | <i>GPX2</i>  | Phospholipid hydroperoxide glutathione peroxidase                                                                                                                      | 43.4 ± 4.1     |
| <i>hyr1Δ</i>                                       | <i>HYR1</i>  | Thiol peroxidase that functions as a hydroperoxide receptor to sense intracellular hydroperoxide levels and transduce a redox signal to the Yap1p transcription factor | 49.3 ± 5.7     |

|              |             |                                                                                                 |            |
|--------------|-------------|-------------------------------------------------------------------------------------------------|------------|
| <i>prx1Δ</i> | <i>PRX1</i> | Mitochondrial peroxiredoxin with<br>thioredoxin peroxidase activity                             | 44.6 ± 6.3 |
| <i>trr1Δ</i> | <i>TRR1</i> | Cytoplasmic thioredoxin reductase                                                               | 54.6 ± 7.5 |
| <i>tsa1Δ</i> | <i>TSA1</i> | Thioredoxin peroxidase; acts as both<br>ribosome-associated and free<br>cytoplasmic antioxidant | 48.3 ± 4.9 |
| <i>tsa2Δ</i> | <i>TSA2</i> | Stress inducible cytoplasmic<br>thioredoxin peroxidase                                          | 41.6 ± 6.2 |

<sup>1</sup> Wild type is strain BY4741 (*MATa*; *his3Δ1*; *leu2Δ0*; *met15Δ0*; *ura3Δ0*). The isogenic knock-out mutants had the phenotype BY4741 *yfg*: *kanMX4* except for a null mutation of one single gene deletion. All strains were purchased from EUROSCARF ([www.euroscarf.de](http://www.euroscarf.de)).
